# Supplementary material for: Prolyl Carboxypeptidase Maintains Receptor Tyrosine Kinase Signaling and Is a Potential Therapeutic Target in Triple Negative Breast Cancer
Source: MDPI journal article supplement (doi:10.3390/cancers14030739), 2022-01-31

### **Supplemental figure legend**

**Figure S1. PRCPi induces apoptosis in TNBC cell lines.** The indicated cell lines were treated with vehicle or PRCPi (5 $\mu$ M or 10 $\mu$ M) for 72 hrs. The cells were analyzed with FACS for cell cycle. Average % sub-G1 cells were presented with SD indicated.

**Figure S2. PRCP cleaves Ang II and increased Ang II-mediated phosphorylation of PKA and CAMKII.** **A.** MCF7 and B6-9 cells were serum starved and treated with Ang II (100 nM) for 5 hrs. Peptides were then precipitated from media and quantitatively analyzed for processed peptide products. Note that Ang (1-7) is increased in B6-9 cells compared with MCF7 cells. **B.** MCF7 and B6-9 cells were serum starved and treated with Ang II (100 nM) for 10 min. Lysates were immunoblotted for the indicated proteins.

Figure S1

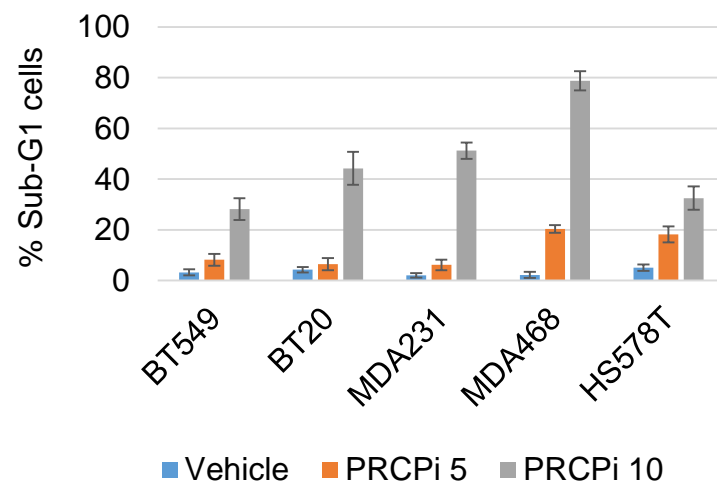

Figure S2

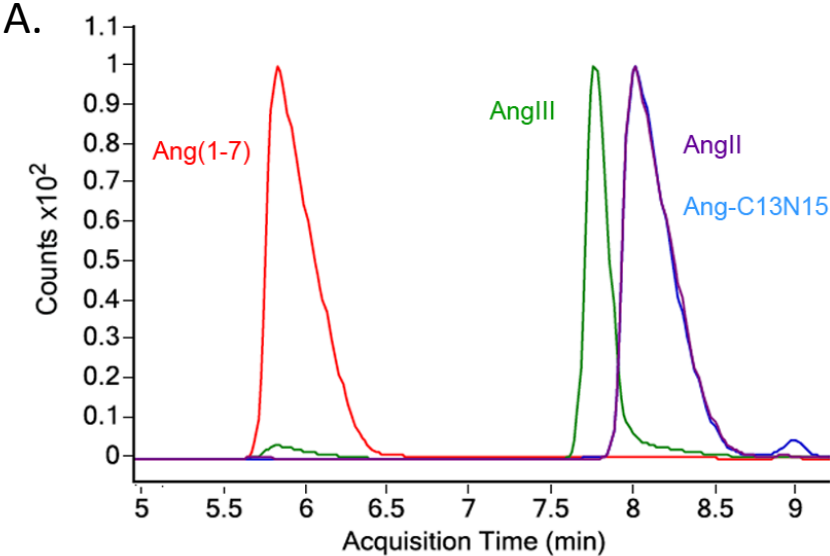

| Peptide  | Sequence | MCF7 |               | B6-9 |                | % of each cleavage product |
|----------|----------|------|---------------|------|----------------|----------------------------|
|          |          | 0h   | 5h            | 0h   | 5h             |                            |
| AngII    | DRVYIHPF | 100  | 5.7 $\pm$ 0.5 | 100  | 8.7 $\pm$ 0.5  | }                          |
| AngIII   | RVYIHPF  |      | 87 $\pm$ 0.2  |      | 78.6 $\pm$ 0.1 |                            |
| AngIV    | VYIHPF   |      | nd            |      | nd             |                            |
| Ang(1-7) | DRVYIHP  |      | 7.4 $\pm$ 0.3 |      | 12.7 $\pm$ 0.4 |                            |

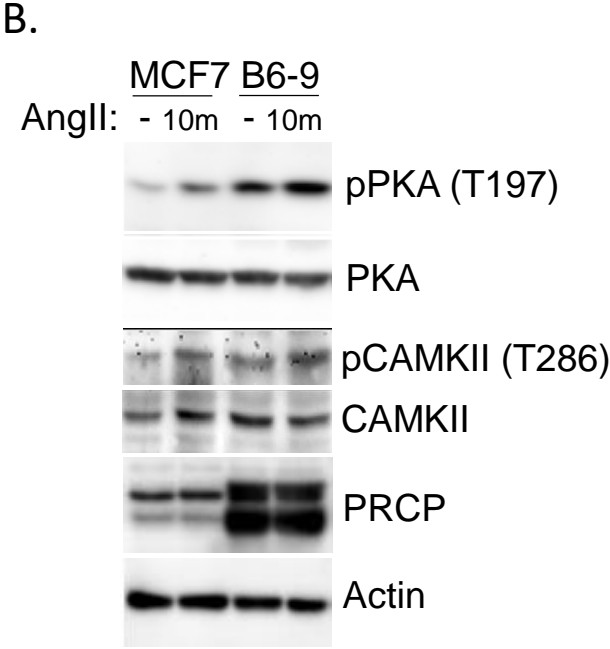

Supplement: s1 [file s1]
